# Supplementary material
Source: PubMed Central journal article supplement (PMC9646892)
Supplement: 41467_2022_34068_MOESM1_ESM.pdf [file 41467_2022_34068_MOESM1_ESM.pdf]

# Supplementary information

Severe Neuro-COVID is associated with peripheral immune signatures, autoimmunity and neurodegeneration: a prospective cross-sectional study

Etter et al.

# Supplementary Figures

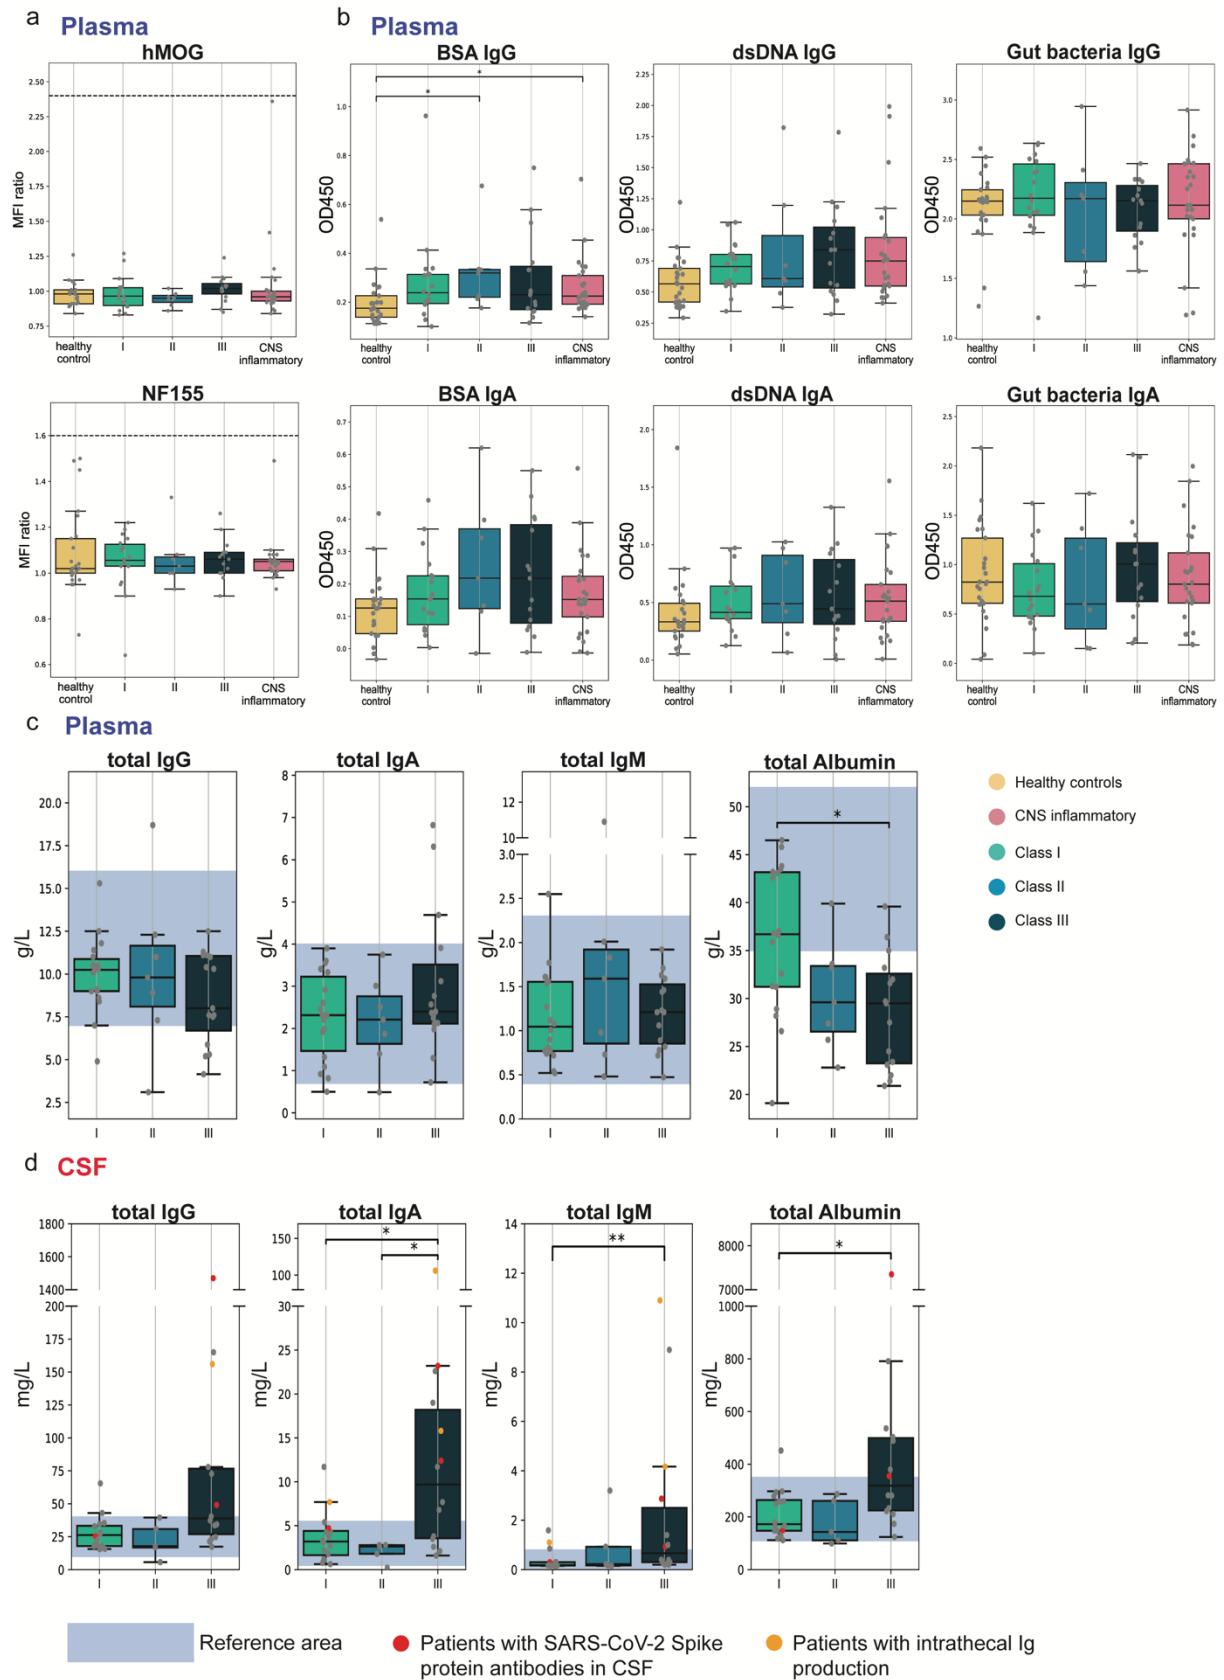

Supplementary Figure 1

**Supplementary Figure 1:** Antibody reactivities against known CNS myelin antigens and total Ig and albumin values per Neuro-COVID class.

Box plot representations (centre line at the median, upper bound at 75<sup>th</sup> percentile, lower bound at 25<sup>th</sup> percentile) of anti-(non)-self reactivities in plasma, total Ig and albumin levels in plasma (n=35) and cerebrospinal fluid (CSF) (n=40) of Neuro-COVID patients (n=40), and anti-myelin plasma reactivities (n=40) with whiskers at minimum and maximum values. Each dot represents one participant. **a** Box plot representation of plasma IgG reactivities against human myelin oligodendrocyte glycoprotein (hMOG) and neurofascin-155 (NF155), plotted as geometric median channel fluorescence (MFI) ratio. Vertical dotted line indicates the cut-off (hMOG: MFI ratio 2.4; NF155: MFI ratio 1.6) **b** Box plot representation of anti-BSA, -dsDNA, anti-gut bacteria (RePOOPulate)-IgG/IgA reactivities (OD<sub>450</sub>; optical density at 450 nm) in plasma. **c** Box plot representation of total plasma IgG/A/M and albumin levels (g/L). Blue boxes indicate the clinical reference area. **d** Box plot representation of total CSF IgG/A/M and albumin levels (mg/L). Blue boxes indicate the clinical reference area.

Statistics (a-d): statistical significance was calculated using two-sided Mann-Whitney-U test and p-values were adjusted using Benjamin-Hochberg (BH)-procedure (adj. p: \*<0.05, \*\*<0.01, \*\*\*<0.001, if not otherwise indicated: not significant). Source data of a and b are provided as a Source Data file.

Legend: MFI: mean fluorescence intensity.

**a Plasma**

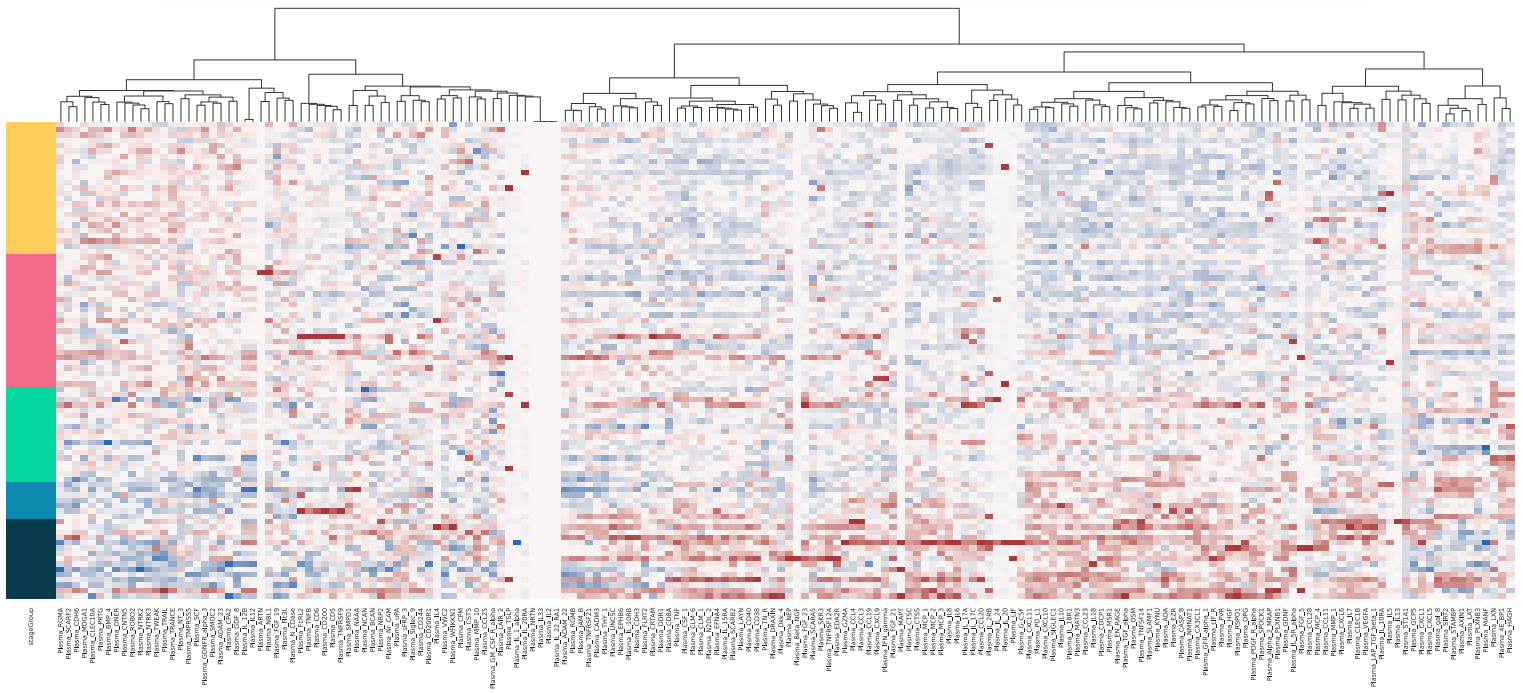

**b CSF**

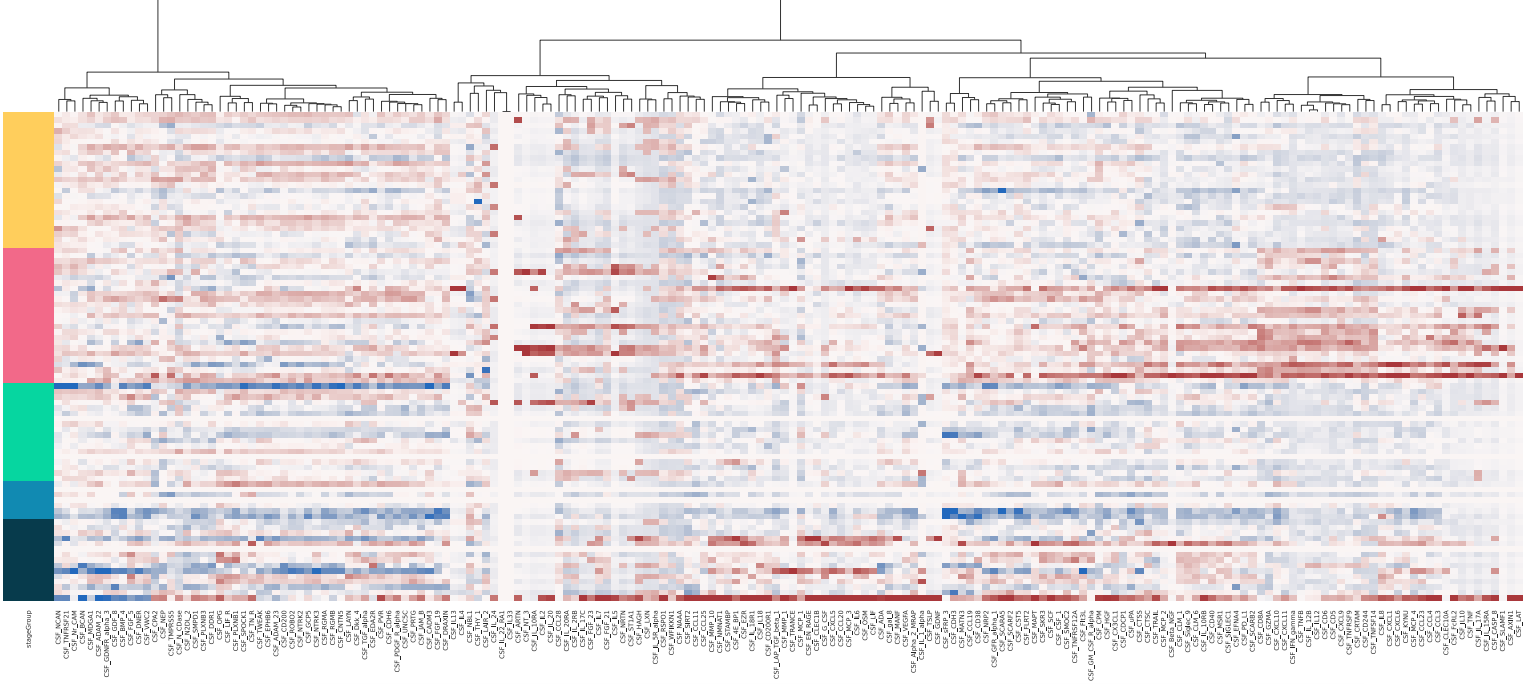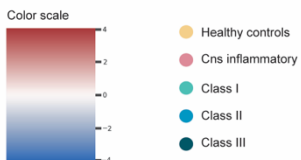

Supplementary Figure 2

**Supplementary Figure 2:** Heatmap of individual CSF and plasma analytes.

Z score clustered heatmap visualization for each Neuro-COVID patient (n=40), group (class I: n=18; class II: n=7; class III: n=15; CNS inflammatory controls: n=25; healthy controls: n=25) and sample source (CSF and plasma). **a** Plasma analytes are represented on the x axis. Each quadrant represents a single protein and individual participant. Participants and groups are represented on the y axis. Z scores are color-coded with red colors (*high*), white (*neutral*) and blue colors (*low*). **b** Cerebrospinal fluid (CSF) analytes are represented on the x axis. Each quadrant represents a single protein and individual participant. Participants and groups are represented on the y axis. Z scores are color-coded with red colors (*high*), white (*neutral*) and blue colors (*low*).



**Supplementary Figure 3:** Low CSF/plasma soluble protein ratios are prevalent in Neuro-COVID patients indicating peripheral synthesis, whereas inflammatory controls display predominant intrathecal changes (rose plot presentation).

Rose plots illustrating the  $\log_2$ -fold change of the cerebrospinal fluid (CSF)/plasma ratio for each cytokine in each group. A value of 0 corresponds to equality, a value of -1 refers to a 2 times less CSF concentration, a value of 1 means a 2 times less plasma concentration. For better visualization, the analytes were split into two separate rose plots. Range: standard error of mean (SEM). Source data are provided as a Source Data file.

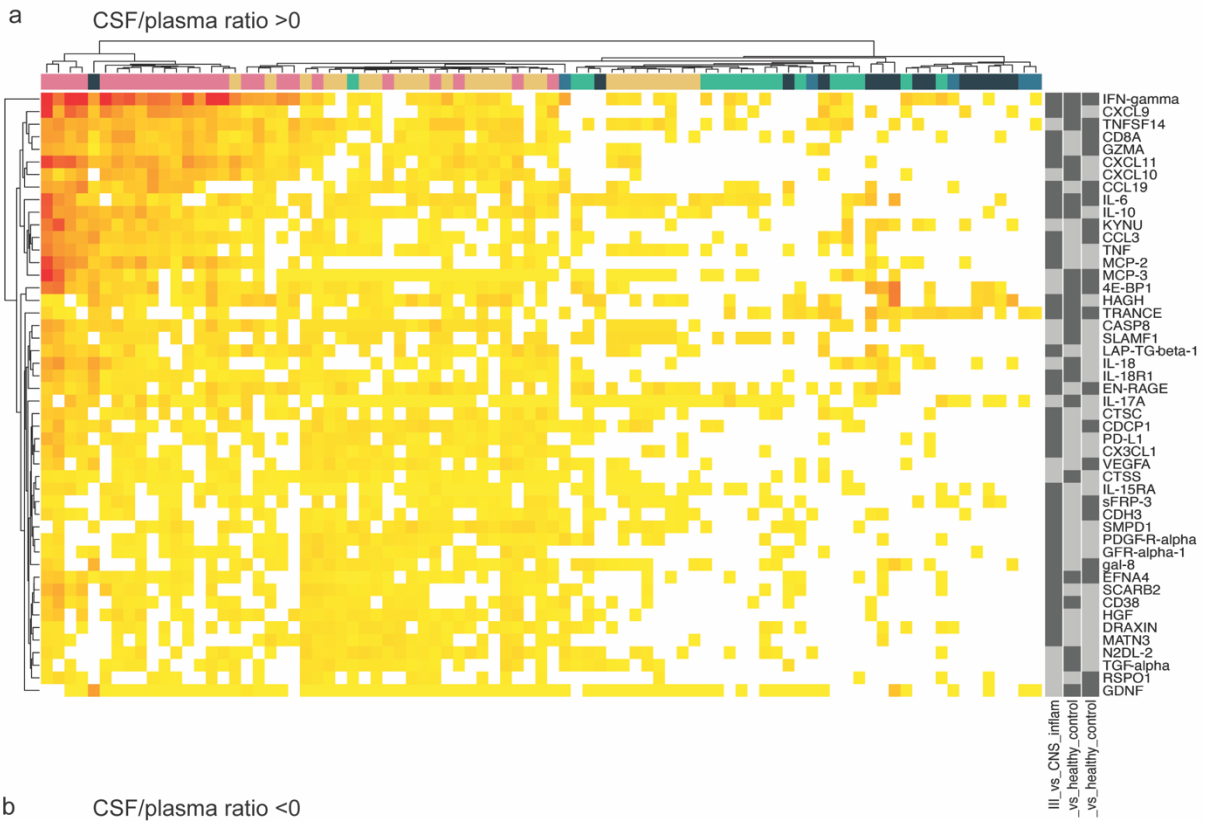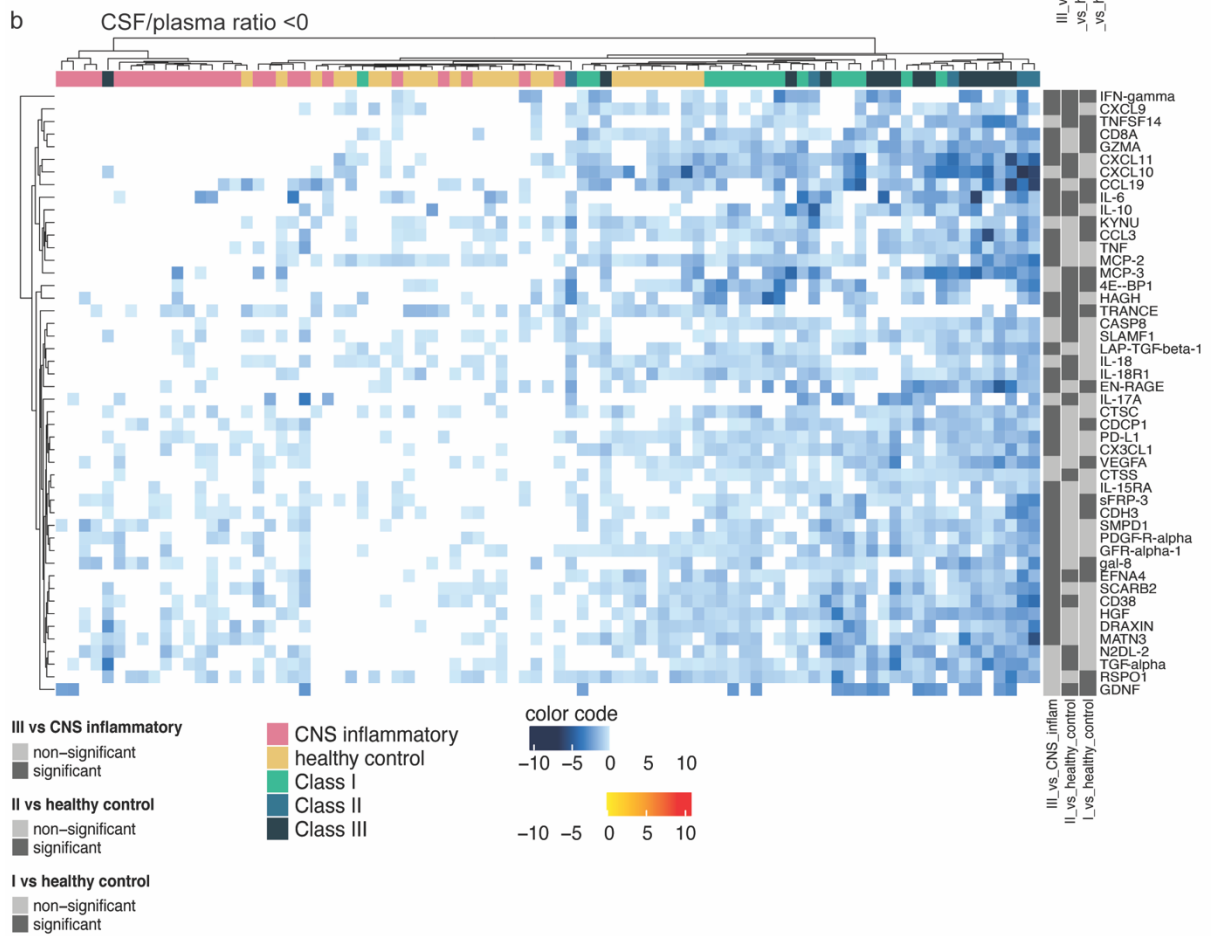

Supplementary Figure 4



**Supplementary Figure 4:** Low CSF/plasma soluble protein ratios are prevalent in Neuro-COVID patients indicating peripheral synthesis, whereas inflammatory controls display predominant intrathecal changes (heat map presentation).

Cerebrospinal fluid (CSF)/plasma ratios of each molecule were assessed to identify significant differences across groups. The ratio of 49 molecules significantly differed between groups after Benjamin-Hochberg (BH)-procedure. These molecules are represented on the y axis on the right of the heatmaps. Ratio values are color-coded with yellow-red colors illustrating a higher ratio *CSF/plasma ratio*  $>0$  and blue colors illustrating a lower ratio *CSF/plasma ratio*  $<0$ . The 3 vertical differently grey colored lines on the y axis demonstrate specific ratio differences between (*from left to right*) class III vs CNS inflammatory, class II vs healthy, and class I vs healthy controls. Heatmaps are separated into molecules with a *CSF/plasma ratio*  $>0$  (*upper heatmap*), indicating intrathecal synthesis, and a *CSF/plasma ratio*  $<0$  (*lower heatmap*), indicating peripheral synthesis. The main ratio changes in Neuro-COVID patients (n=40) take place in the plasma, whereas central nervous system (CNS) inflammatory controls display a stronger intrathecal immune response (1) compared to Neuro-COVID patients and (2) compared to immune reactions in their plasma. Source data are provided as a Source Data file.

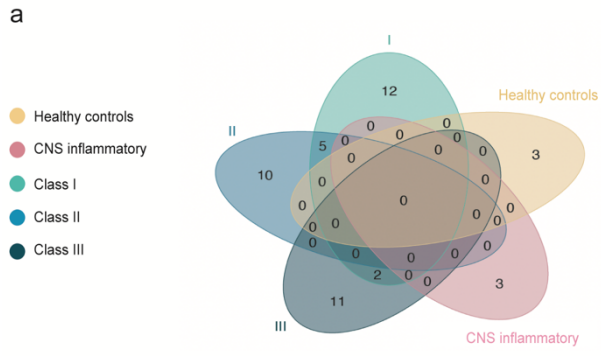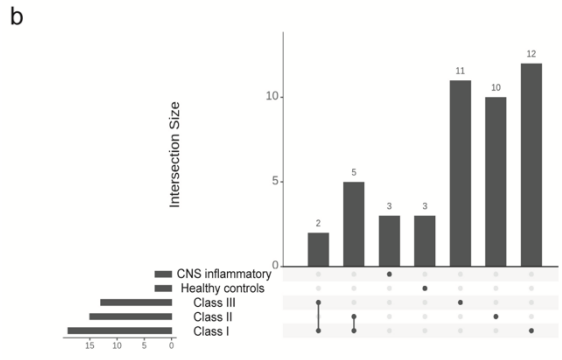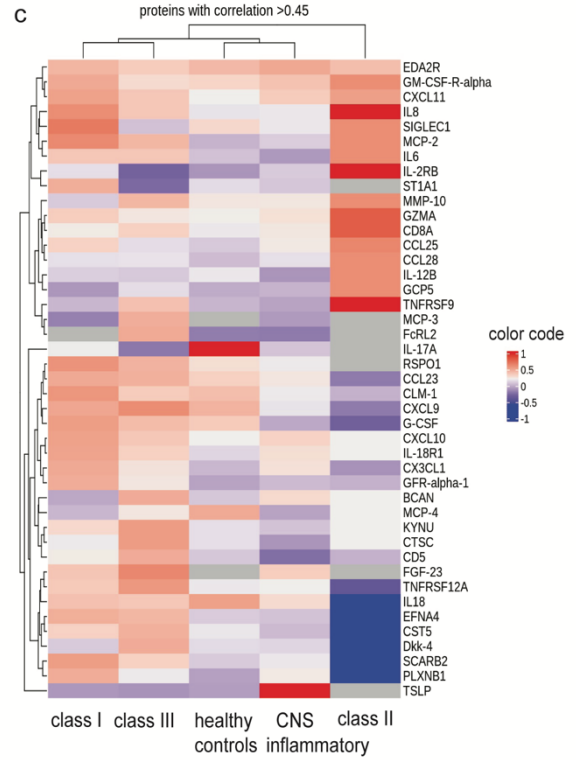

Supplementary Figure 5

**Supplementary Figure 5:** Individual CSF and plasma analytes with a strong CSF-plasma correlation.

Cerebrospinal fluid (CSF)-plasma correlation analysis with Venn diagram (a), UpSet plot (b) and a heatmap (c) of the strongest correlated genes (correlation coefficient  $>0.45$ ).

**a** and **b** Venn diagram and UpSet plot demonstrate 10-12 class-defining proteins with a strong CSF-plasma correlation and only a few overlapping proteins. **c** CSF-plasma correlation values are color-coded, indicating strong correlation values in red color and low correlation values in blue color. Heatmap depicts a myeloid/eosinophil proinflammatory signature in class I patients, changing to a T-cell-mediated, proinflammatory feature in class II patients. Myeloid signature correlations are preserved in class II and partly overlap with class I patients. In class III, the strongest CSF-plasma correlation pattern is characterized by biomarkers implicating tissue damage and neuronal damage.

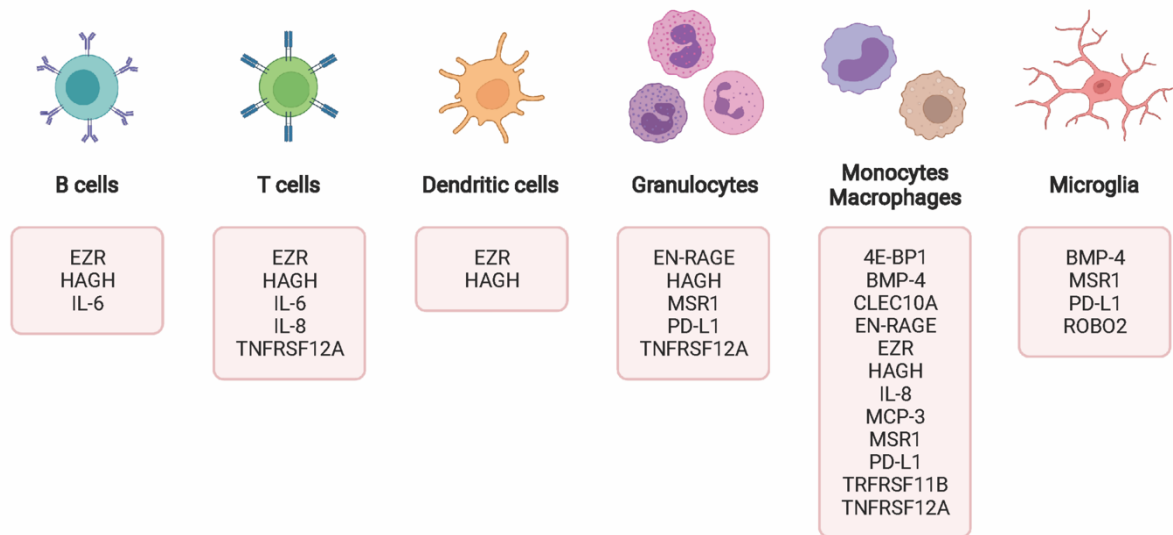

Supplementary Figure 6

**Supplementary Figure 6:** Immune cell sources of proteins associated with COVID-19 severity.

Microglia and innate immune cells like granulocytes, monocytes and macrophages are the sources of most cerebrospinal fluid (CSF) and plasma proteins associated with severe COVID-19 and Neuro-COVID development (4E-BP1, BMP-4, CLEC10A, EN-RAGE, EZR, HAGH, IL-8, MCP-3, MSR1, PD-L1, ROBO2, TRFRSF11B and TNFRSF12A). B and T lymphocytes and dendritic cells are the sources of a smaller number of proteins (EZR, HAGH, IL-6, IL-8, TNFRSF12A) with high predictive value for severe COVID-19 and Neuro-COVID class III development. The assessment of protein cell sources was based on mRNA expression in immune single cell types from a public scRNA-seq database. Data source: [proteinatlas.org](https://proteinatlas.org). Created with Biorender.com.

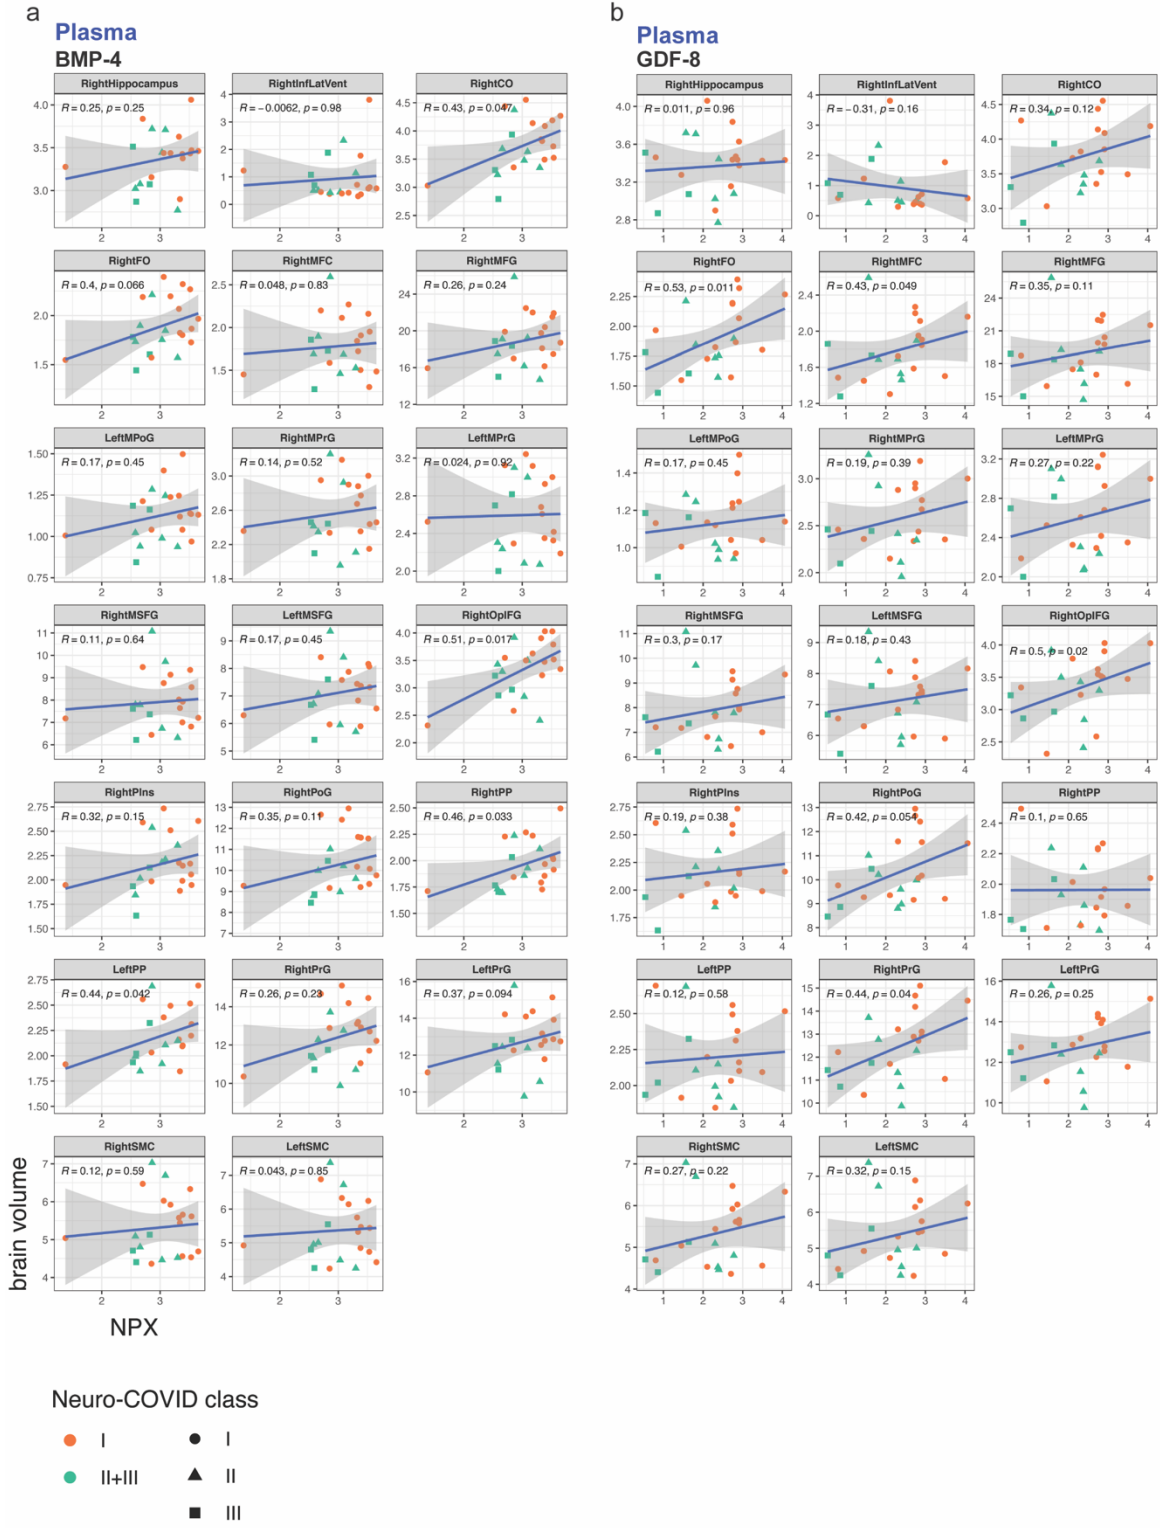

Supplementary Figure 7

**Supplementary Figure 7:** Elevated BMP-4 and GDF-8 plasma levels are associated with preserved GMVs in Neuro-COVID patients.

Spearman correlation scatter plots with linear regression (blue line) and the 95% confidence interval (gray band) demonstrating the correlation of **a** BMP-4 and **b** GDF-8 plasma levels and different regional brain volumes in Neuro-COVID patients (n=40). The y axis represents the regional brain volume values. The x axis represents the marginalized normalized protein expression (NPX) of the respective protein. Two-sided spearman correlation test was applied. None of the adjusted p-values was significant after Benjamin-Hochberg (BH)-procedure.

Legend: R: Spearman correlation coefficient, p: associated p-value, RightFO: right frontal operculum, LeftPrG: left precentral gyrus, RightOpIFG: right opercular part of the inferior frontal gyrus, RightInfLatVent: right inferior lateral ventricle, LeftPP: left planum polare, RightPIns: right posterior insula, RightCO: right central operculum.

**a**  
**Plasma**  
**PD-L1**

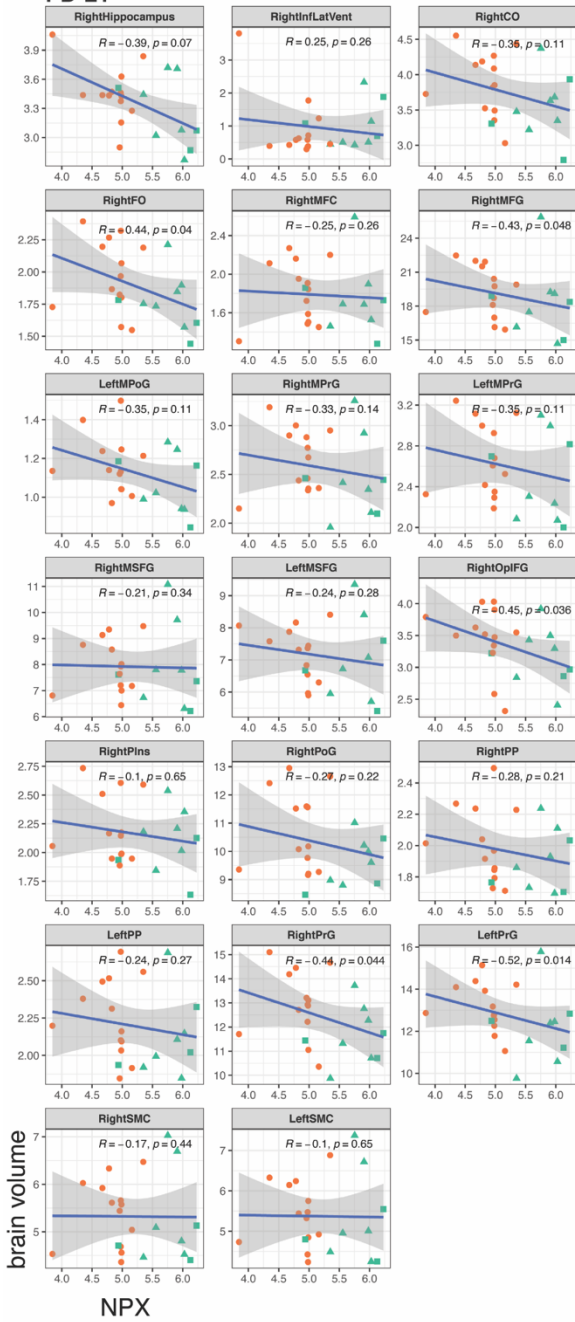

**b**  
**Plasma**  
**HGF**

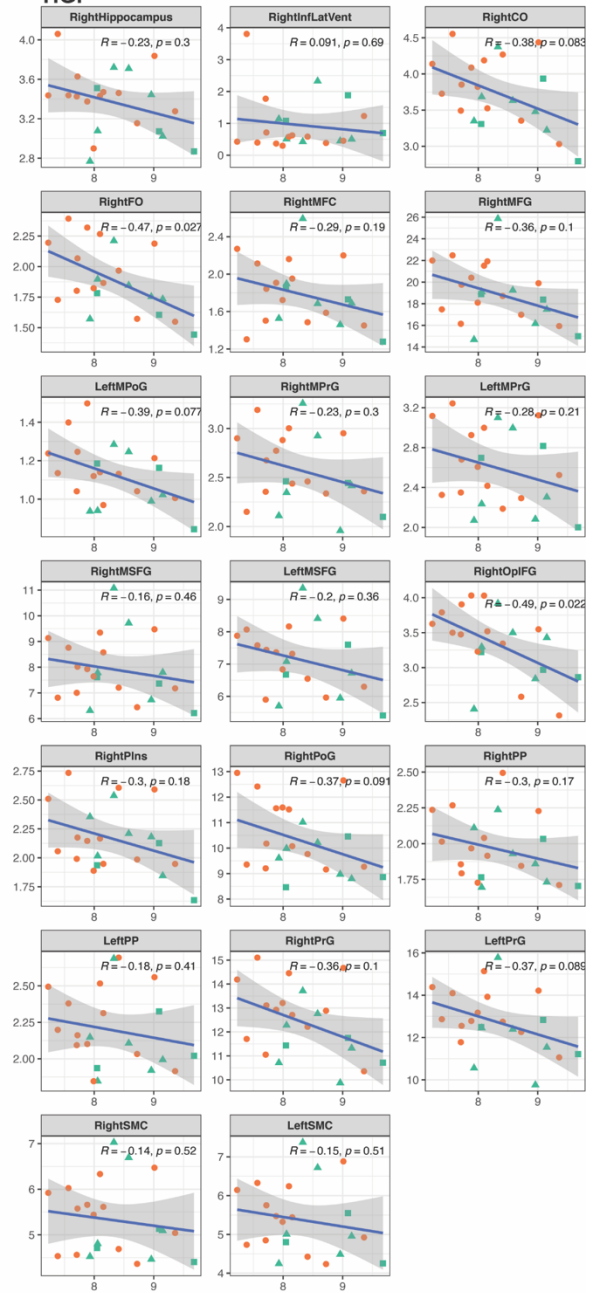

Neuro-COVID class

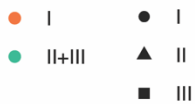

Supplementary Figure 8

**Supplementary Figure 8:** Elevated PD-L1 and HGF plasma levels are associated with decreased GMVs in Neuro-COVID patients.

Spearman correlation scatter plots with linear regression (blue line) and the 95% confidence interval (gray band) demonstrating the correlation of **a** PD-L1 and **b** HGF plasma levels and different regional brain volumes in Neuro-COVID patients (n=40). The y axis represents the regional brain volume values. The x axis represents the marginalized normalized protein expression (NPX) of the respective protein. Two-sided spearman correlation test was applied. None of the adjusted p-values was significant after Benjamin-Hochberg (BH)-procedure.

Legend: R: Spearman correlation coefficient, p: associated p-value, RightFO: right frontal operculum, LeftPrG: left precentral gyrus, RightOpIFG: right opercular part of the inferior frontal gyrus, RightInfLatVent: right inferior lateral ventricle, LeftPP: left planum polare, RightPIIns: right posterior insula, RightCO: right central operculum.



a

**Plasma**

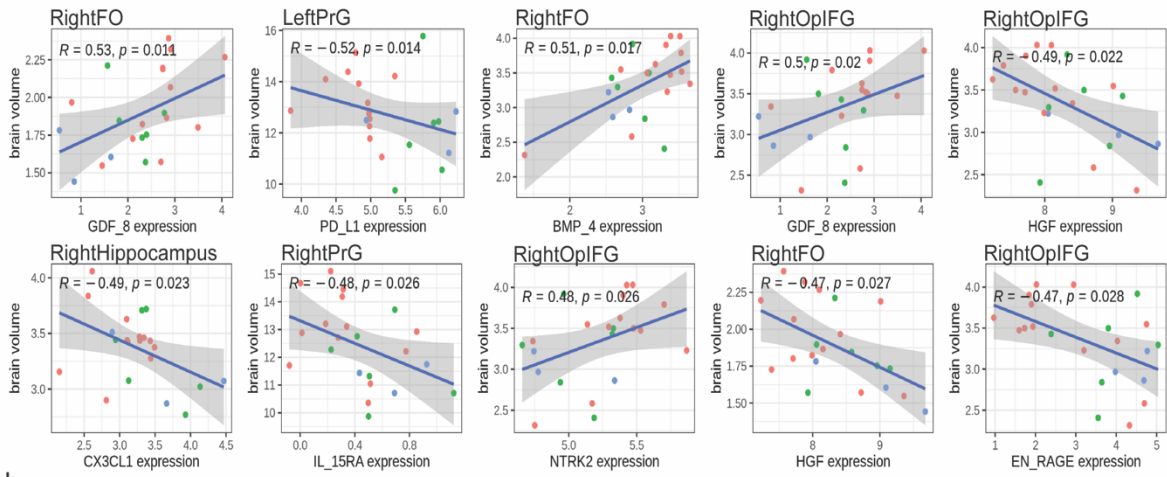

b

**CSF**

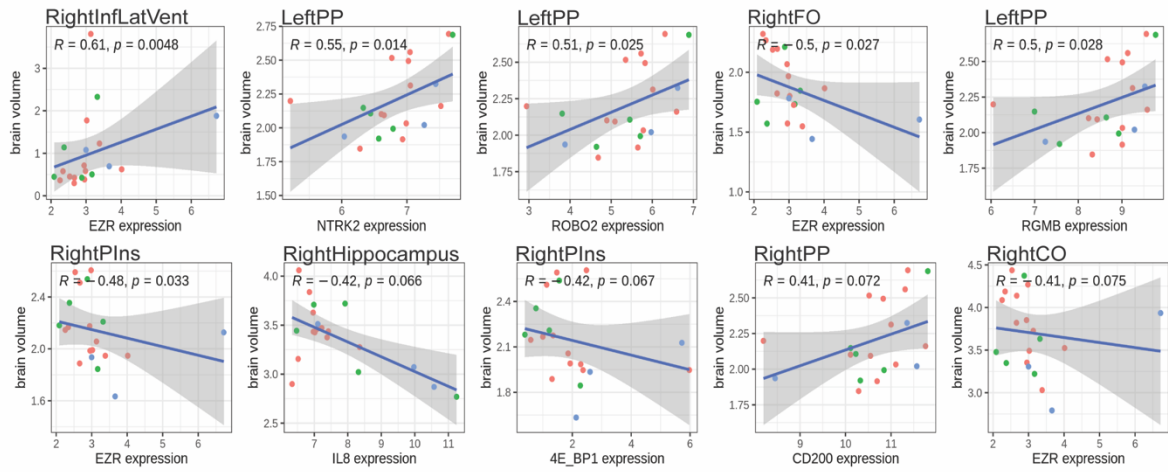

Neuro-COVID class

- I
- II
- III

Supplementary Figure 9

**Supplementary Figure 9:** Correlation analysis of brain regions and proteins with most significant associations.

**a** Spearman correlation scatter plots with linear regression (blue line) and the 95% confidence interval (gray band) of marginalized normal protein expression (NPX) of individual plasma analytes associated with *decreased regional brain volumes*: PD-L1, HGF, CX3CL1, IL-15RA, EN-RAGE; and plasma analytes associated with *protective effects on regional brain volumes*: GDF-8, BMP-4, NTRK2. Statistics: none of the p-values are significant after Benjamin-Hochberg (BH)-procedure. **b** Boxplot representations of marginalized NPX individual cerebrospinal fluid (CSF) analytes associated with *decreased regional brain volumes*: EZR, IL-8, 4E-BP1; and CSF analytes associated with *protective effects on regional brain volumes*: EZR, NTRK2, ROBO2, RGMB, CD200. Two-sided spearman correlation test was applied. None of the p-values are significant after BH-procedure.

Legend: R: Spearman correlation coefficient, p: associated p-value, RightFO: right frontal operculum, LeftPrG: left precentral gyrus, RightOpIFG: right opercular part of the inferior frontal gyrus, RightInfLatVent: right inferior lateral ventricle, LeftPP: left planum polare, RightPIIns: right posterior insula, RightCO: right central operculum, R: correlation coefficient, p: p-value.

## Supplementary Tables

|                                                                                      |          |
|--------------------------------------------------------------------------------------|----------|
| <b>Healthy control cases (n=25)</b>                                                  |          |
| <b>Age, years, mean (SD)</b>                                                         | 52 (18)  |
| Range, years                                                                         | 23-75    |
| <b>Sex</b>                                                                           |          |
| Female, n (%)                                                                        | 12 (48%) |
| Male, n (%)                                                                          | 13 (52%) |
| <b>CNS inflammatory control cases (n=25)</b>                                         |          |
| <b>Age, years, mean (SD)</b>                                                         | 54 (19)  |
| Range, years                                                                         | 20-82    |
| <b>Sex</b>                                                                           |          |
| Female, n (%)                                                                        | 12 (48%) |
| Male, n (%)                                                                          | 13 (52%) |
| <b>Neurologic disorder</b>                                                           |          |
| Postherpetic neuralgia, n (%)                                                        | 1 (4%)   |
| Herpetic meningitis, n (%)                                                           | 1 (4%)   |
| Herpetic encephalitis, n (%)                                                         | 1 (4%)   |
| Herpetic meningoencephalitis, n (%)                                                  | 1 (4%)   |
| VZV meningomyeloradiculitis, n (%)                                                   | 1 (4%)   |
| Disseminated herpes zoster with CNS affection, n (%)                                 | 3 (12%)  |
| Viral meningitis (not specified), n (%)                                              | 2 (8%)   |
| Viral meningoencephalitis (not specified), n (%)                                     | 1 (4%)   |
| Relapsing meningitis of unclear etiology, n (%)                                      | 1 (4%)   |
| Eosinophilic encephalitis, n (%)                                                     | 3 (12%)  |
| Cranial neuropathy, n (%)                                                            | 1 (4%)   |
| Tuberculous meningoencephalitis, n (%)                                               | 3 (12%)  |
| Neuroborreliosis, n (%)                                                              | 3 (12%)  |
| Red nucleus lesion of unclear etiology, n (%)                                        | 1 (4%)   |
| Neurosarcoidosis, n (%)                                                              | 1 (4%)   |
| Susac's syndrome, n (%)                                                              | 1 (4%)   |
| Autoimmune encephalitis, n (%)                                                       | 1 (4%)   |
| Rasmussen encephalitis, n (%)                                                        | 1 (4%)   |
| SD: standard deviation<br>VZV: varicella-zoster virus<br>CNS: central nervous system |          |

**Supplementary Table 1:** Characteristics of patients with a non-MS inflammatory neurologic disorder and healthy controls.

Demographics of healthy individuals (n=25) and non-MS inflammatory neurologic disorder patients (CNS inflammatory controls, n=25). For non-MS inflammatory neurologic disorder patients, specific neurological conditions are depicted.

Legend: SD: standard deviation, VZV: varicella-zoster virus, CNS: central nervous system.

|                                                         | <b>Class I</b><br>(n=18) | <b>Class II</b><br>(n=7) | <b>Class III</b><br>(n=15) |
|---------------------------------------------------------|--------------------------|--------------------------|----------------------------|
| <b>CSF characteristics</b>                              |                          |                          |                            |
| <b>Protein levels</b>                                   |                          |                          |                            |
| Missing, n                                              | 4                        | 2                        | 1                          |
| Protein levels, mg/L, mean (SD)                         | 334 (124)                | 282 (114)                | 1424<br>(3056)             |
| Range, mg/L                                             | 103-673                  | 174-429                  | 286-12000                  |
| Elevated protein (>500mg/L), n (%)                      | 1 (7.1%)                 | 0 (0%)                   | 10 (71.4%)                 |
| <b>Leukocyte count</b>                                  |                          |                          |                            |
| Missing, n                                              | 5                        | 2                        | 2                          |
| Leukocyte count, x10 <sup>6</sup> /L, mean (SD)         | 3 (3)                    | 3 (2)                    | 12 (27)                    |
| Range, x10 <sup>6</sup> /L                              | 1-12                     | 1-7                      | 0-99                       |
| Elevated leukocyte count (≥5x10 <sup>6</sup> /L), n (%) | 1 (7.7%)                 | 1 (20%)                  | 6 (46.2%)                  |
| <b>Albumin ratio (CSF/plasma)</b>                       |                          |                          |                            |
| Missing, n                                              | 6                        | 4                        | 6                          |
| Ratio, mean (SD)                                        | 5.2 (2.1)                | 5.2 (3.1)                | 13.1 (7.8)                 |
| Elevated ratio (≥8.2x10 <sup>-3</sup> ), n (%)          | 1 (8.3%)                 | 1 (33.3%)                | 6 (66.7%)                  |
| <b>Glucose levels</b>                                   |                          |                          |                            |
| Missing, n                                              | 4                        | 2                        | 2                          |
| Glucose levels, mmol/L, mean (SD)                       | 4.3 (1.2)                | 4.8 (1.5)                | 5.3 (1.8)                  |
| Range, mmol/L                                           | 3.2-7.6                  | 3.5-7.2                  | 2.9-7.9                    |
| Elevated glucose (>6.1mmol/L), n (%)                    | 1 (7.1%)                 | 1 (20%)                  | 4 (30.8%)                  |
| <b>Glucose ratio (CSF/plasma)</b>                       |                          |                          |                            |
| Missing, n                                              | 9                        | 3                        | 1                          |
| Ratio, mean (SD)                                        | 0.6 (0.1)                | 0.5 (0.1)                | 0.7 (0.1)                  |
| <b>Lactate levels</b>                                   |                          |                          |                            |
| Missing, n                                              | 4                        | 2                        | 3                          |
| Lactate levels, mmol/L, mean (SD)                       | 1.7 (0.3)                | 2.0 (0.7)                | 2.8 (1.9)                  |
| Range, mmol/L                                           | 1.4-2.2                  | 1.3-2.9                  | 1.6-8.4                    |
| Elevated lactate (>2mmol/L), n (%)                      | 3 (21.4%)                | 2 (40%)                  | 9 (75%)                    |

**Supplementary Table 2:** CSF characteristics of Neuro-COVID patients per class.

Detailed cerebrospinal fluid (CSF) characteristics of all Neuro-COVID patients donating CSF samples (n=35), including protein levels, the leukocyte count, CSF/plasma Albumin ratio, CSF glucose levels, the CSF/plasma glucose ratio and CSF lactate levels. Legend: SD: standard deviation

|                                                  |          |
|--------------------------------------------------|----------|
| <b>Class I (n=4)</b>                             |          |
| <b>Age, years, mean (SD)</b>                     | 64 (10)  |
| Range, years                                     | 51-80    |
| <b>Sex</b>                                       |          |
| Female, n (%)                                    | 2 (50%)  |
| Male, n (%)                                      | 2 (50%)  |
| <b>Preexisting disorders</b>                     |          |
| Chronic kidney disease, n (%)                    | 1 (25%)  |
| Arterial hypertension, n (%)                     | 3 (75%)  |
| Coronary heart disease, n (%)                    | 1 (25%)  |
| <b>Main neurological symptom at presentation</b> |          |
| Headache                                         | 3 (75%)  |
| Anosmia                                          | 1 (25%)  |
| <b>Class III (n=4)</b>                           |          |
| <b>Age, years, mean (SD)</b>                     | 64 (13)  |
| Range, years                                     | 48-78    |
| <b>Sex</b>                                       |          |
| Female, n (%)                                    | 1 (25%)  |
| Male, n (%)                                      | 3 (75%)  |
| <b>Preexisting disorders</b>                     |          |
| No past medical history, n (%)                   | 1 (25%)  |
| Arterial hypertension, n (%)                     | 3 (75%)  |
| Diabetes mellitus, n (%)                         | 2 (50%)  |
| Chronic obstructive pulmonary disease, n (%)     | 1 (25%)  |
| Coronary heart disease, n (%)                    | 1 (25%)  |
| Cancer of any type, n (%)                        | 1 (25%)  |
| <b>Main neurological symptom at presentation</b> |          |
| Encephalopathy, n (%)                            | 4 (100%) |

**Supplementary Table 3:** Patient characteristics of class I and class III Neuro-COVID patients selected for B cell receptor sequencing.

Demographics, past medical history and main neurological symptom at presentation of selected class I (n=4) and class III (n=4) Neuro-COVID patients.

| Structures                      | Control (mean) | Control (sd) | Patient (mean) | Patient (sd) | t stat | pval uncor   | pval corr |
|---------------------------------|----------------|--------------|----------------|--------------|--------|--------------|-----------|
| R Hippocampus                   | 3.321          | 0.388        | 3.360          | 0.349        | -2.227 | <b>0.035</b> | 0.297     |
| R Inf Lat Vent                  | 0.697          | 0.302        | 0.923          | 0.754        | -2.132 | <b>0.043</b> | 0.297     |
| R Central Operculum             | 4.005          | 0.430        | 3.693          | 0.471        | 2.137  | <b>0.042</b> | 0.297     |
| R Frontal Operculum             | 2.027          | 0.264        | 1.843          | 0.260        | 2.288  | <b>0.031</b> | 0.297     |
| R Medial Frontal Cortex         | 1.889          | 0.234        | 1.780          | 0.290        | 2.222  | <b>0.036</b> | 0.297     |
| R Middle Frontal Gyrus          | 18.939         | 2.250        | 18.425         | 2.590        | 2.062  | <b>0.049</b> | 0.315     |
| L Medial Postcentral Gyrus      | 1.184          | 0.180        | 1.102          | 0.159        | 2.313  | <b>0.029</b> | 0.297     |
| R Medial Precentral Gyrus       | 2.667          | 0.355        | 2.510          | 0.347        | 2.213  | <b>0.036</b> | 0.297     |
| L Medial Precentral Gyrus       | 2.714          | 0.371        | 2.524          | 0.375        | 3.237  | <b>0.003</b> | 0.190     |
| R Medial Superior Frontal Gyrus | 8.277          | 1.092        | 7.843          | 1.165        | 2.659  | <b>0.013</b> | 0.275     |
| L Medial Superior Frontal Gyrus | 7.376          | 0.873        | 7.006          | 0.980        | 2.246  | <b>0.034</b> | 0.297     |
| R Posterior Insula              | 2.371          | 0.292        | 2.164          | 0.285        | 2.362  | <b>0.026</b> | 0.297     |
| R Postcentral Gyrus             | 10.984         | 1.546        | 10.299         | 1.287        | 2.398  | <b>0.024</b> | 0.297     |
| R Planum Polare                 | 2.101          | 0.238        | 1.946          | 0.228        | 2.331  | <b>0.028</b> | 0.297     |
| L Planum Polare                 | 2.327          | 0.244        | 2.178          | 0.259        | 2.150  | <b>0.041</b> | 0.297     |
| R Precentral Gyrus              | 12.895         | 1.575        | 12.222         | 1.515        | 2.617  | <b>0.015</b> | 0.275     |
| L Precentral Gyrus              | 13.296         | 1.589        | 12.590         | 1.454        | 3.238  | <b>0.003</b> | 0.190     |
| R Supplementary Motor Cortex    | 5.461          | 0.713        | 5.243          | 0.712        | 2.698  | <b>0.012</b> | 0.275     |
| L Supplementary Motor Cortex    | 5.569          | 0.733        | 5.243          | 0.806        | 2.914  | <b>0.007</b> | 0.228     |

**Supplementary Table 4:** Smaller regional brain volumes in Neuro-COVID patients compared to the volumetric imaging control group.

Twenty brain regions were constituted with a lesser volume in the Neuro-COVID group (n=35) compared to healthy controls (n=36). The regional volumes were compared between groups using a linear regression model. Additional covariates were age, sex, age\*sex interaction, MRI magnetic field strength and total intracranial volume (TIV). One-sided Levene's test of equal variances was used to assess whether dependent variable's variance is equal in both groups. Statistics: there were no significant

differences after false discovery rate (FDR) correction. Significant correlation values,  $p < 0.05$  (uncorrected), are represented in bold.

Legend: sd: standard deviation, uncorr: uncorrected, corr: corrected, R: right, L: left, Inf: inferior, lat: lateral, Vent: ventricle.



|                                              | <b>COVID-19 patients</b> | <b>Controls</b>        |
|----------------------------------------------|--------------------------|------------------------|
| <b>Numbers of subjects</b>                   | 35                       | 36                     |
| <b>Age</b>                                   | 51.9, sd (19.7)          | 54.03, sd (23.7)       |
| <b>Sex, Male/Female</b>                      | M/F (14/21)              | (13/23)                |
| <b>stroke</b>                                | 2                        | na                     |
| <b>CSF Leukocytes</b>                        | 17 (4.29, sd 3.72)       | na                     |
| <b>CSF Lactate</b>                           | 18 (1.89, sd 0.50)       | na                     |
| <b>CSF Protein</b>                           | n=18 (346.11, sd 180.83) | na                     |
| <b>CSF Blood Albumin Ratio</b>               | n=15 (6.50, sd 4.60)     | na                     |
| <b>CSF Glucose</b>                           | n=18 (4.49, sd 1.30)     | na                     |
| <b>Plasma TRANCE</b>                         | n=20 (2.74, sd 0.93)     | na                     |
| <b>Plasma EN-RAGE</b>                        | n=20 (3.30, sd 1.37)     | na                     |
| <b>CSF OPG</b>                               | n=18 (9.55, sd 0.68)     | na                     |
| <b>CSF TRANCE</b>                            | n=18 (-0.31, sd 0.29)    | na                     |
| <b>CSF EN-RAGE</b>                           | n=18 (0.43, sd: 0.74)    | na                     |
| <b>Died in Hospital</b>                      | 1                        | na                     |
| <b>Neurocovid state</b>                      | n=1 (13), 2 (6), 3 (2)   | na                     |
| <b>Weight [kg]</b>                           | 69.88 (sd 11.95)         | 71.53(sd 16.30)        |
| <b>Height [meters]</b>                       | 1.69 (sd 0.09)           | 1.69 (sd 0.11)         |
| <b>MRI magnetic Field strength</b>           | 1.5 T (30)<br>3 T (5)    | 1.5 T (11)<br>3 T (25) |
| <b>TIV [cm<sup>3</sup>]</b>                  | 1431(sd 141,96)          | 1497(sd 156.293)       |
| <b>Global gray matter [cm<sup>3</sup>]</b>   | 618.65 (sd 98.86)        | 638.61 (sd 95.38)      |
| <b>Global White matter [cm<sup>3</sup>]*</b> | 449.28 (sd 63.76)        | 451.09 (sd 62.63)      |
| <b>CSF matter [cm<sup>3</sup>]</b>           | 373.04 (sd 137.65)       | 408.01 (sd 147.46)     |
| <b>BPF</b>                                   | 0.74 (sd 0.08)           | 0.73 (sd 0.08)         |
| <b>Parenchyma Volume [cm<sup>3</sup>]</b>    | 1067.94 (sd 138.22)      | 1089.70 (sd 137.40)    |

**Supplementary Table 5:** Regional brain volume values for the volumetric imaging Neuro-COVID group and control group.

Brain regional volume differences between Neuro-COVID patients (n=35) and the control group (n=36). Normal distributions of all variables were assessed using Shapiro-Wilk test and visual inspection of the histograms. To test the variances' equality, Levene's test was applied. Clinical and demographic variables were compared between groups with t-test for independent groups, Mann-Whitney-U test or Chi-square test where appropriate. All applied tests were one-sided. Source data are provided as a Source Data file.

Legend: sd: standard deviation, uncorr: uncorrected, corr: corrected. Significant correlations values,  $p < 0.05$  (uncorrected), are represented in bold.

| Structures                  | CSF Leukocytes corr | pval         | CSF Protein corr | pval         | CSF Blood Albumin Ratio corr | pval         |
|-----------------------------|---------------------|--------------|------------------|--------------|------------------------------|--------------|
| L Accumbens Area            | -0.821              | <b>0.029</b> | -0.709           | 0.054        | -0.767                       | 0.059        |
| LAmygdala                   | -0.687              | 0.081        | -0.744           | <b>0.049</b> | -0.740                       | 0.078        |
| L Basal Forebrain           | -0.749              | 0.050        | -0.664           | 0.067        | -0.657                       | 0.111        |
| L Fusiform Gyrus            | -0.721              | 0.060        | -0.788           | <b>0.036</b> | -0.750                       | 0.073        |
| L Inferior Temporal Gyrus   | -0.761              | 0.050        | -0.599           | 0.104        | -0.704                       | 0.082        |
| L Medial Orbital Gyrus      | -0.748              | 0.050        | -0.601           | 0.104        | -0.687                       | 0.089        |
| L Posterior Cingulate Gyrus | -0.746              | 0.050        | -0.593           | 0.105        | -0.528                       | 0.266        |
| Optic Chiasm                | -0.639              | 0.123        | -0.758           | <b>0.044</b> | -0.829                       | <b>0.028</b> |
| R Anterior Orbital Gyrus    | -0.805              | <b>0.029</b> | -0.763           | <b>0.044</b> | -0.806                       | <b>0.040</b> |
| R Amygdala                  | -0.727              | 0.058        | -0.832           | <b>0.015</b> | -0.838                       | <b>0.028</b> |
| R Angular Gyrus             | -0.432              | 0.329        | -0.688           | 0.062        | -0.837                       | <b>0.028</b> |
| R Entorhinal Area           | -0.849              | <b>0.029</b> | -0.866           | <b>0.008</b> | -0.899                       | <b>0.009</b> |
| R Lateral Orbital Gyrus     | -0.816              | <b>0.029</b> | -0.632           | 0.078        | -0.639                       | 0.118        |
| R Posterior Orbital Gyrus   | -0.795              | <b>0.031</b> | -0.714           | 0.054        | -0.793                       | <b>0.046</b> |
| R Putamen                   | -0.588              | 0.157        | -0.731           | 0.049        | -0.786                       | <b>0.046</b> |
| R Superior Frontal Gyrus    | -0.571              | 0.172        | -0.733           | 0.049        | -0.705                       | 0.082        |

**Supplementary Table 6:** Significant associations of regional brain volumes and clinical variables.

The significant associations between regional brain volume and clinical variables in the Neuro-COVID group (n=35) were assessed using partial correlation, allowing to calculate the linear partial correlation between our variables of interest adjusting for different covariates. Covariates were age, sex, age\*sex interaction, MRI magnetic field strength and TIV. To adjust for multiple comparisons a false discovery rate (FDR) method was used. All correlation values were negative. For each region the partial correlation value and their corrected p-value is shown. Source data are provided as a Source Data file.

Legend: In bold, significant FDR p-values corrected ( $p < 0.05$ ). CSF: Cerebrospinal fluid, L: left, R: right, pval: p values corrected by FDR, corr: correlation.

|                                                                | <b>Class I</b><br>(n=18) | <b>Class II</b><br>(n=7) | <b>Class III</b><br>(n=15) |
|----------------------------------------------------------------|--------------------------|--------------------------|----------------------------|
| <b>13-months follow-up</b>                                     |                          |                          |                            |
| Follow-up performed, n (%)                                     | 18 (100%)                | 7 (100%)                 | 8 (53.3%)                  |
| Lost to follow-up, n (%)                                       | 0 (0%)                   | 0 (0%)                   | 7 (46.7%)                  |
| Full recovery without any new deficits, n (%)*                 | 11 (61.1%)               | 1 (14.3%)                | 0 (0%)                     |
| Long-COVID, n (%)*                                             | 6 (33.3%)                | 6 (85.7%)                | 3 (37.5%)                  |
| Concentration problems, n (%)*                                 | 3 (17.6%)                | 5 (71.4%)                | 1 (12.5%)                  |
| Memory problems, n (%)*                                        | 3 (17.6%)                | 4 (57.1%)                | 2 (25%)                    |
| Chronic fatigue, n (%)*                                        | 0 (0%)                   | 5 (71.4%)                | 2 (25%)                    |
| Speech/communication difficulties, n (%)*                      | 0 (0%)                   | 1 (14.3%)                | 0 (0%)                     |
| Change/loss of smell, n (%)*                                   | 0 (0%)                   | 2 (28.6%)                | 0 (0%)                     |
| Change/loss of taste, n (%)*                                   | 1 (5.9%)                 | 1 (14.3%)                | 0 (0%)                     |
| Muscle pain, n (%)*                                            | 2 (11.8%)                | 1 (14.3%)                | 0 (0%)                     |
| Difficulties in daily activities, n (%)*                       | 3 (17.6%)                | 2 (28.6%)                | 1 (12.5%)                  |
| Deceased, n (%)                                                | 1 (5.6%)                 | 0 (0%)                   | 5 (62.5%)                  |
| In hospital during the ongoing study, n (%)*                   | 0 (0%)                   | -                        | 3 (37.5%)                  |
| *percentage value refers to the number of conducted follow-ups |                          |                          |                            |

### **Supplementary Table 7: 13-months follow-up results.**

Results per Neuro-COVID class of a 13-months post-COVID-19 follow-up performed using the modified COVID-19 Yorkshire Rehabilitation Screening (C19-YRS).
